# Supplementary material for: Structural Insights into the Binding Modes of SHP2 Allosteric Inhibitors
Source: Research Square preprint supplement (doi:10.21203/rs.3.rs-7575211/v1), 2025-10-20
Supplement: Supplementary file 1 [file 1c2a822087248e59095fd662.docx]

**Figure S1. Structural analysis of the dominant conformation of complexes.** SHP099 and C8 in complex with SHP2 (teal) andSHP1 (pink) after 100 ns MD simulations, shown in cartoon and licorice representations. **The binding pocket was visualized by selecting residues within 5 Å of the ligand and shown in surface representation.**

**Figure S2. Trajectory analysis of SHP099 and C8 in complex with SHP2 and SHP1 after 100**

**ns MD simulation.**

a) RMSF of the SHP099 and C8 in complex with SHP1, and apo-SHP1.

b) RMSF of the SHP099, and C8 in complex with SHP2 and apo-SHP2.

c) Heatmap of residue contributions to the binding free energy of C8 with SHP2 and SHP1.

**Figure S3. Trajectory analysis of protonated and unprotonated SHP099 in complex with SHP2 after 100 ns MD simulation.**

a) RMSD of the trajectory of protonated and unprotonated SHP099 in complex with SHP2 and ligands alone.

b) RMSF of the protonated (green) and unprotonated SHP099 (blue) in complex with SHP2, and apo-SHP2 (black).

c) Isosurface representation of the protein in complex with the protonated and unprotonated SHP099 within 5 Angstrom after 100ns CpHMD simulation.

d) Ligand placement of protonated and unprotonated SHP099 within the dominant SHP2 conformation.

**Figure S4. RMSF analyses of the SHP099–SHP2 complex and apo-SHP2 at different pH values after a 50 ns CpHMD simulation.**

A) RMSF analysis of SHP099–SHP2 complexes and apo-SHP2 at pH 5.5, pH 7.5, and pH 12.

B) RMSF analysis of SHP099–SHP2 complexes and apo-SHP2 at pH 5.5.

C) RMSF analysis of SHP099–SHP2 complexes and apo-SHP2 at pH 7.5.

D) RMSF analysis of SHP099–SHP2 complexes and apo-SHP2 at pH 12.

**Figure S5**. **Trajectory analysis of the SHP099 in complex with SHP2 after 100 ns MD simulation at different pHs.**

A) Isosurface representation of the protein at pH5.5 (right) and 7.5 (left) within 5 Angstrom of protonated SHP099 after 50ns CpHMD simulation with surface volume.

B) Licorice representation of SHP099 protonated at pH 5.5 (magenta) and 7.5 (dark blue) and pH12 (ice blue) of the visualized trajectory using VMD.

C) The heatmap of the decomposed energies of the residues of less than -1 kcal/mol of SHP099 protonated against SHP2 at different pHs. The lowest free binding energy is represented as blue with -9 kcal/mol and yellow representing the highest free binding energy of 0 kcal/mol. The total free binding energy of different ligand complexes; SHP099 protonated against SHP2 at different pHs.
